# Supplementary material
Source: PubMed Central journal article supplement (PMC6664186)

## Synthesis of oxidized phospholipids by *sn*-1 acyl transferase using 2-15-HETE lysophospholipids

Gao-Yuan Liu<sup>1,2</sup>, Sung Ho Moon<sup>2</sup>, Christopher M. Jenkins<sup>2</sup>, Harold F. Sims<sup>2</sup>, Shaoping Guan<sup>2</sup>, and Richard W. Gross<sup>1,2,3,4</sup>

### SUPPORTING FIGURES

<sup>1</sup>H NMR spectra of 1-Ac-2-AA-ether-*sn*-glycerol, 2-AA-ether-3-trityl-*sn*-glycerol, L-2-AA-ether-LPC, D-2-AA-ether-LPC, and *rac*-2-AA-ether-LPC. The spectra were recorded on a Varian spectrometer (400 MHz) and are referenced relative to tetramethylsilane proton signals at  $\delta$  0 ppm.

SI Fig 1. Proton NMR spectrum of 1-Ac-2-AA-ether-*sn*-glycerol

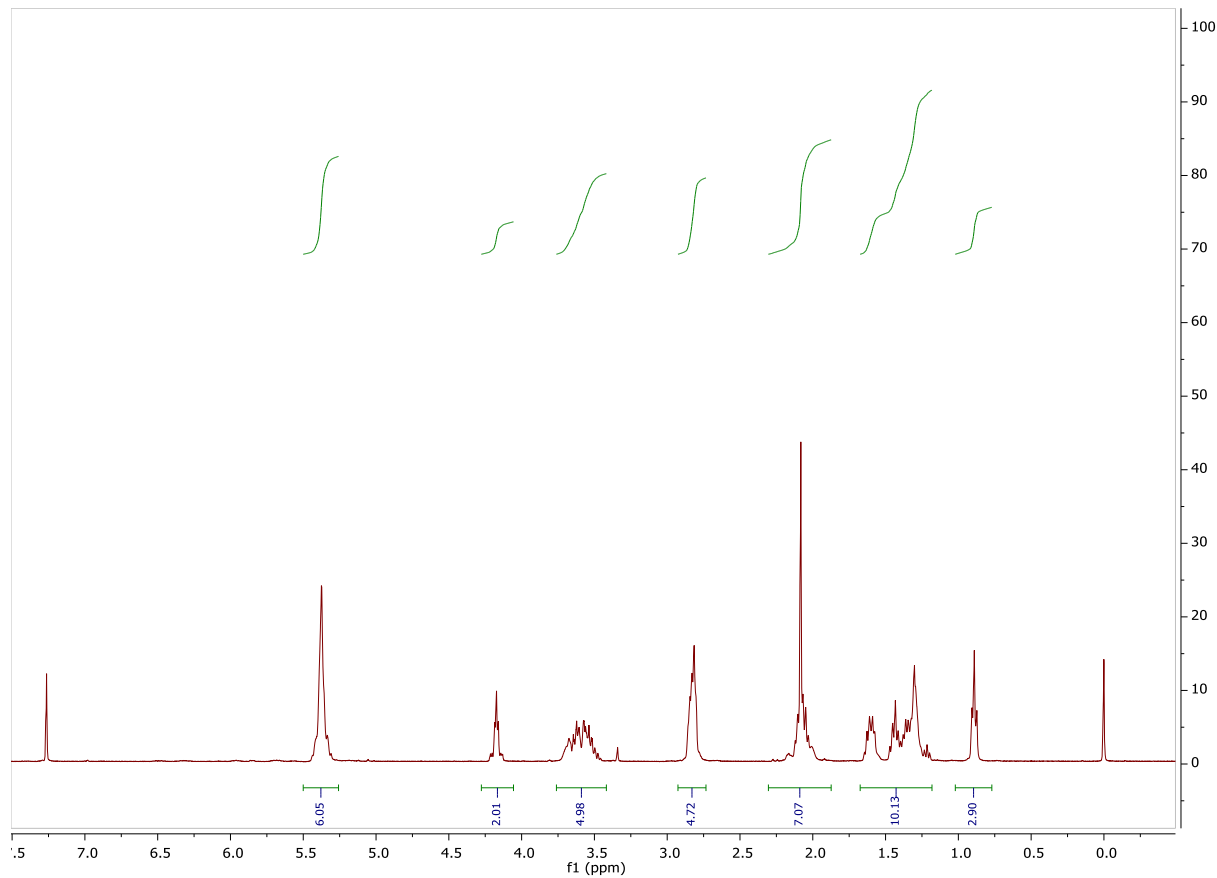

SI Fig 2. Proton NMR spectrum of 2-AA-ether-3-trityl-sn-glycerol

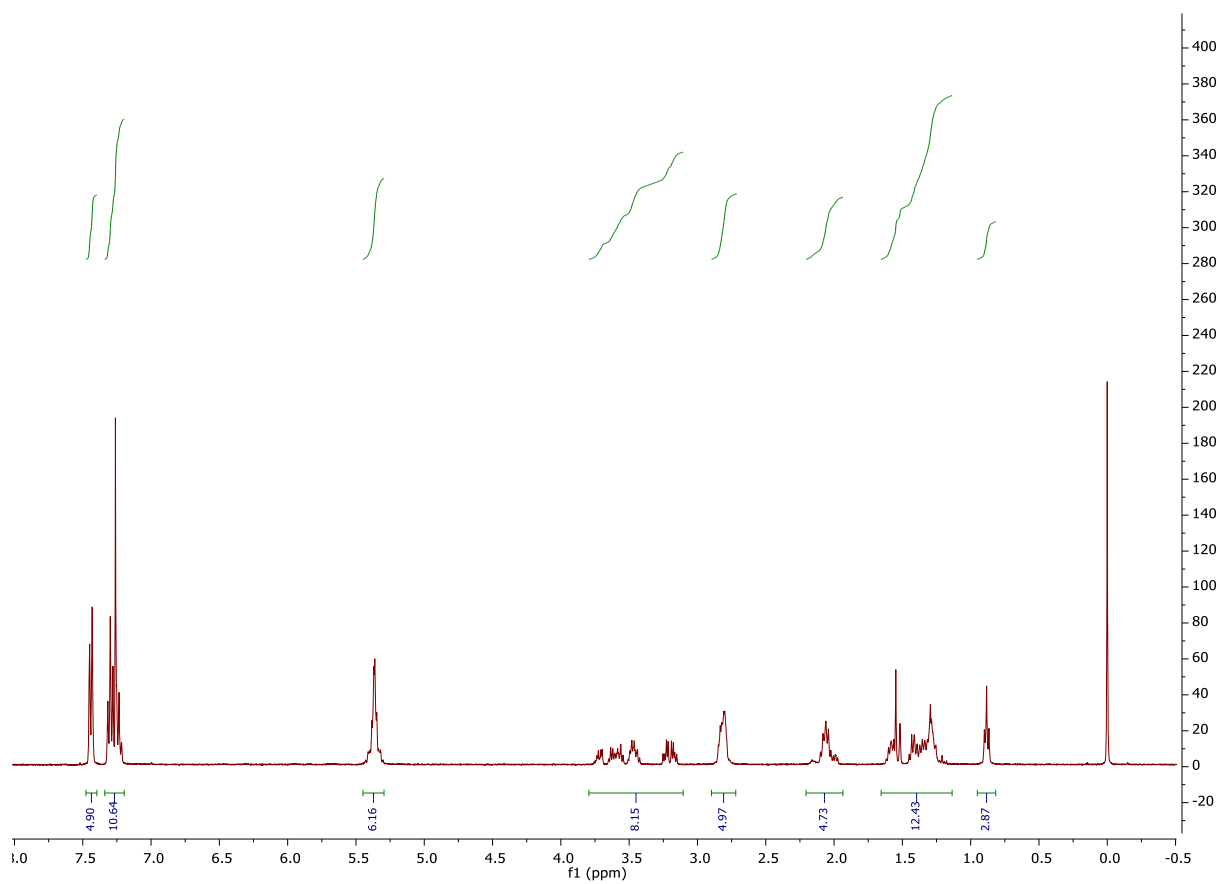

SI Fig 3. Proton NMR spectrum of L-2-AA-ether-LPC

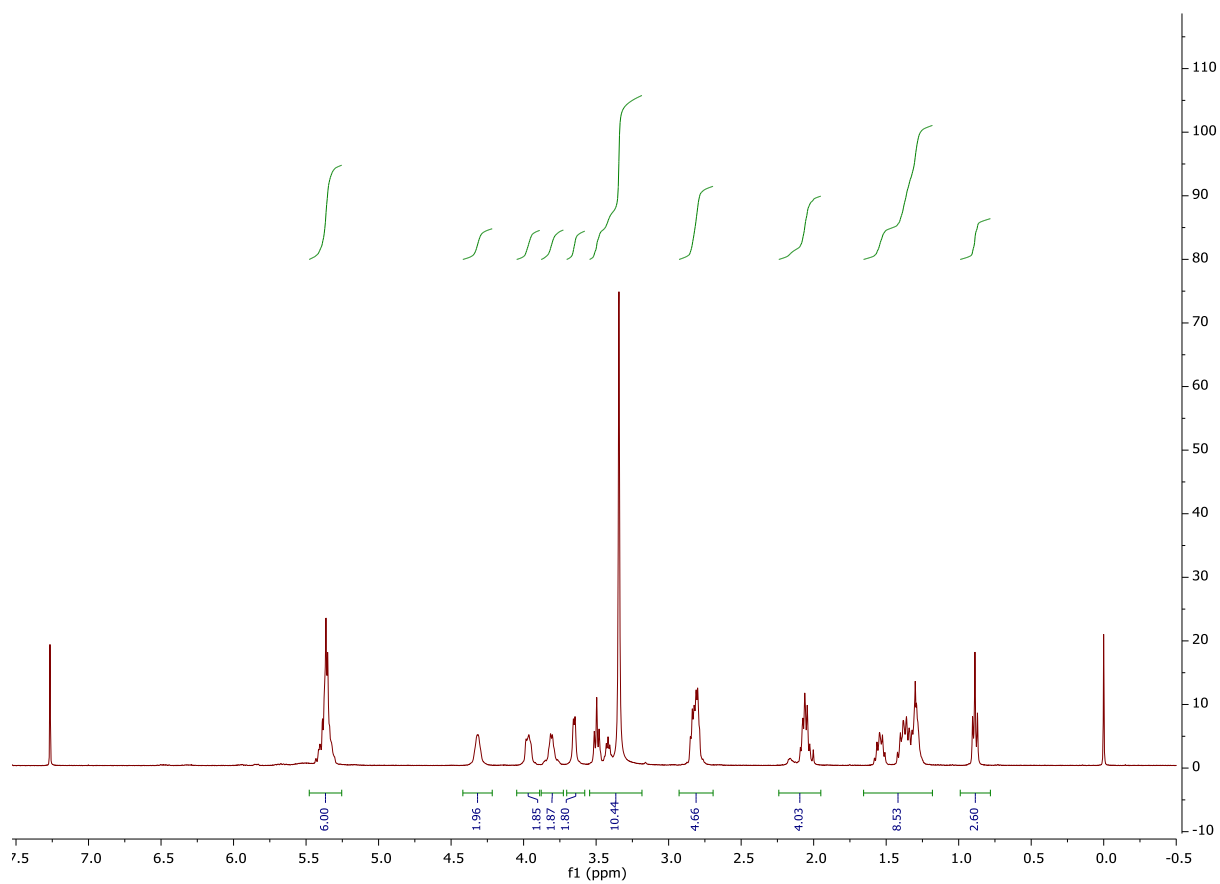

SI Fig 4. Proton NMR spectrum of D-2-AA-ether-LPC

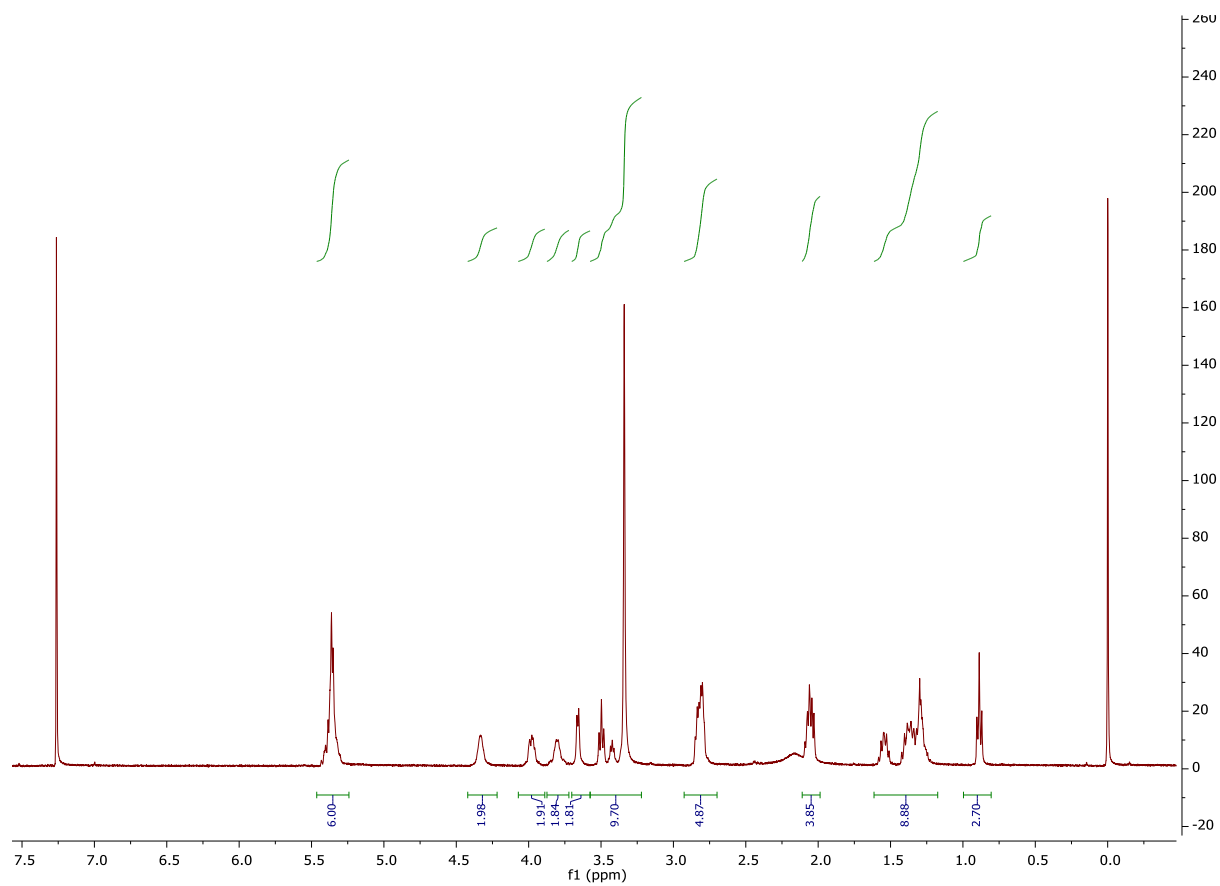

SI Fig 5. Proton NMR spectrum of *rac*-2-AA-ether-LPC

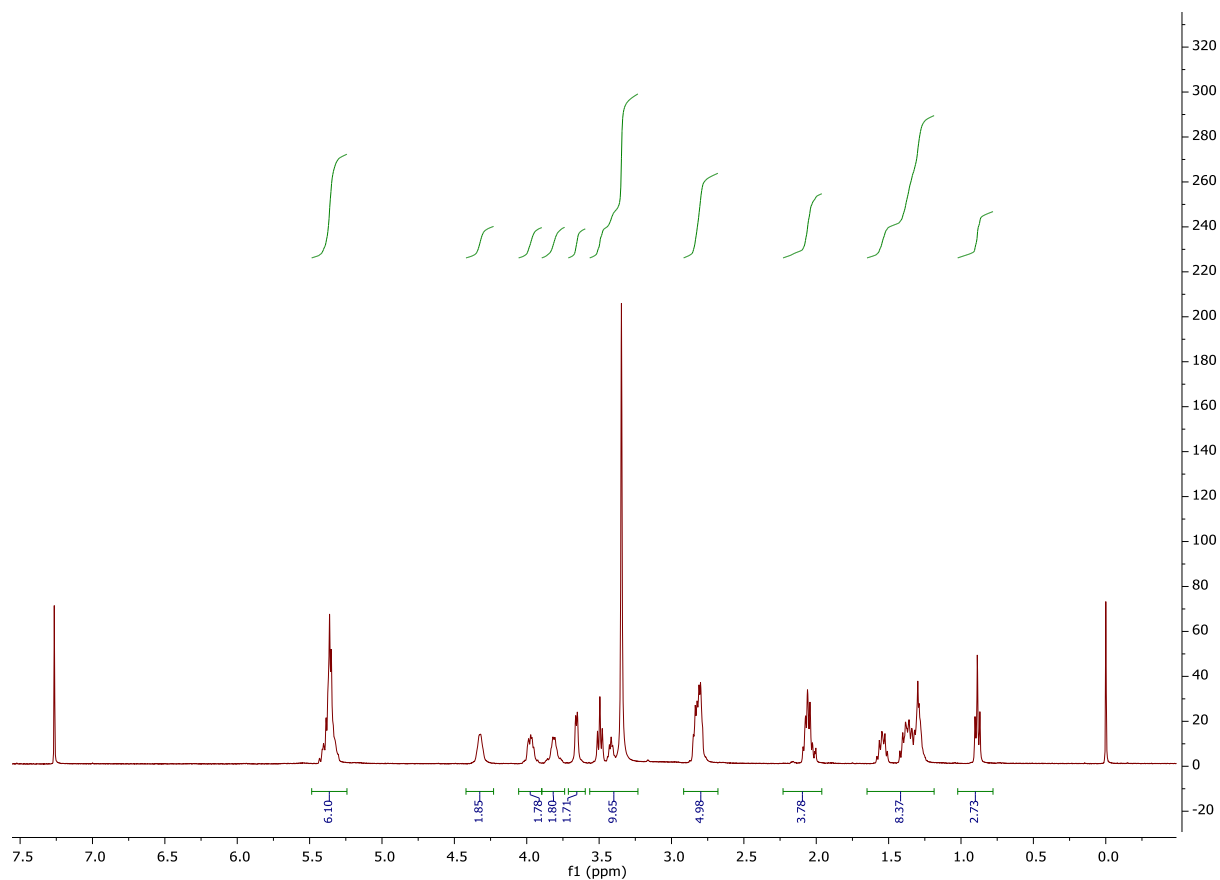

Supplement: supp_RA119.008766_144753_1_supp_320001_pr8ywj.pdf [file supp_RA119.008766_144753_1_supp_320001_pr8ywj.pdf]
